# Supplementary material for: Non-catalytic synthesis of Chromogen I and III from N-acetyl-d-glucosamine in high-temperature water
Source: Royal Society of Chemistry journal article supplement (doi:10.1039/c3gc41161c), 2013-01-01
Supplement: c3gc41161c.pdf [file c3gc41161c.pdf]

Supplementary Information

**Non Catalytic Synthesis of Chromogen I and III from *N*-acetyl-D-glucosamine in  
High-temperature Water**

Mitsumasa OSADA <sup>a\*</sup>, Kazushi KIKUTA <sup>a</sup>, Kohei YOSHIDA <sup>a</sup>, Kazuhide TOTANI <sup>a</sup>,

Makoto OGATA <sup>b</sup>, and Taichi USUI <sup>c</sup>

<sup>a</sup> Department of Chemical Engineering, Ichinoseki National College of Technology,  
Ichinoseki, Iwate, 021-8511, Japan

<sup>b</sup> Department of Chemistry and Biochemistry, Fukushima National College of Technology,  
Nagao 30, Kamiarakawa, Taira, Iwaki, Fukushima, 970-8034, Japan

<sup>c</sup> Department of Bioscience, Graduate School of Science and Technology, Shizuoka  
University, Ohya 836, Suruga ward, Shizuoka 422-8529, Japan

Corresponding author. Tel.: +81-191-24-4767; fax: +81-191-24-2146

E-mail osada@ichinoseki.ac.jp

List of Supplementary Information:

S1. HPLC chromatograph examples

S2. Characterization of Chromogen I, 3,6-anhydro-GNF, **1**, 3,6-anhydro-MNF, **2**, and

Chromogen III

## S1. HPLC chromatograph examples

(a) 180°C, 25 MPa, reaction time 17 sec

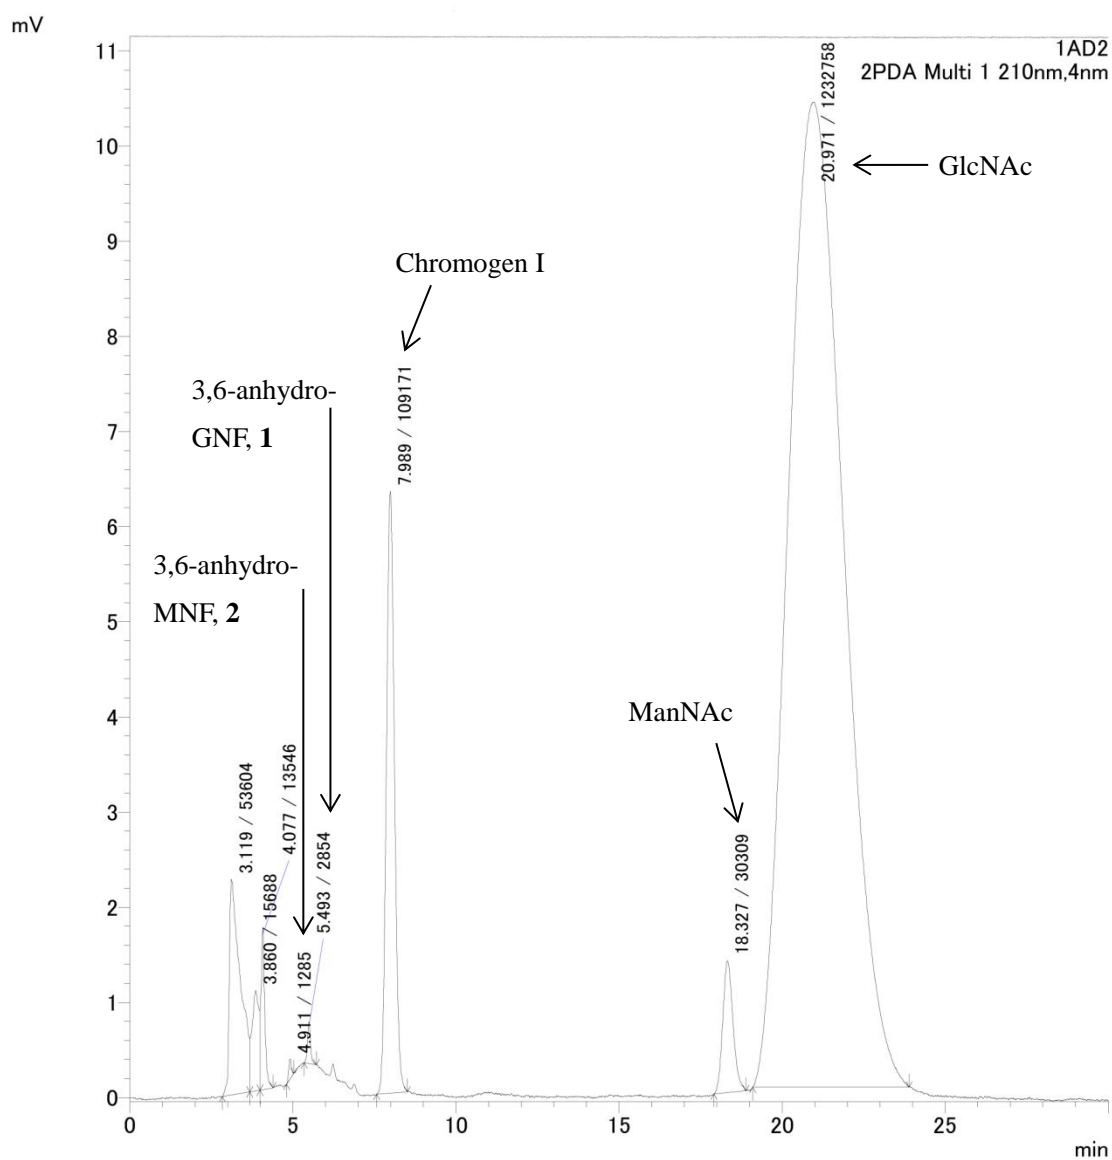

(b) 180°C, 25 MPa, reaction time 33 sec

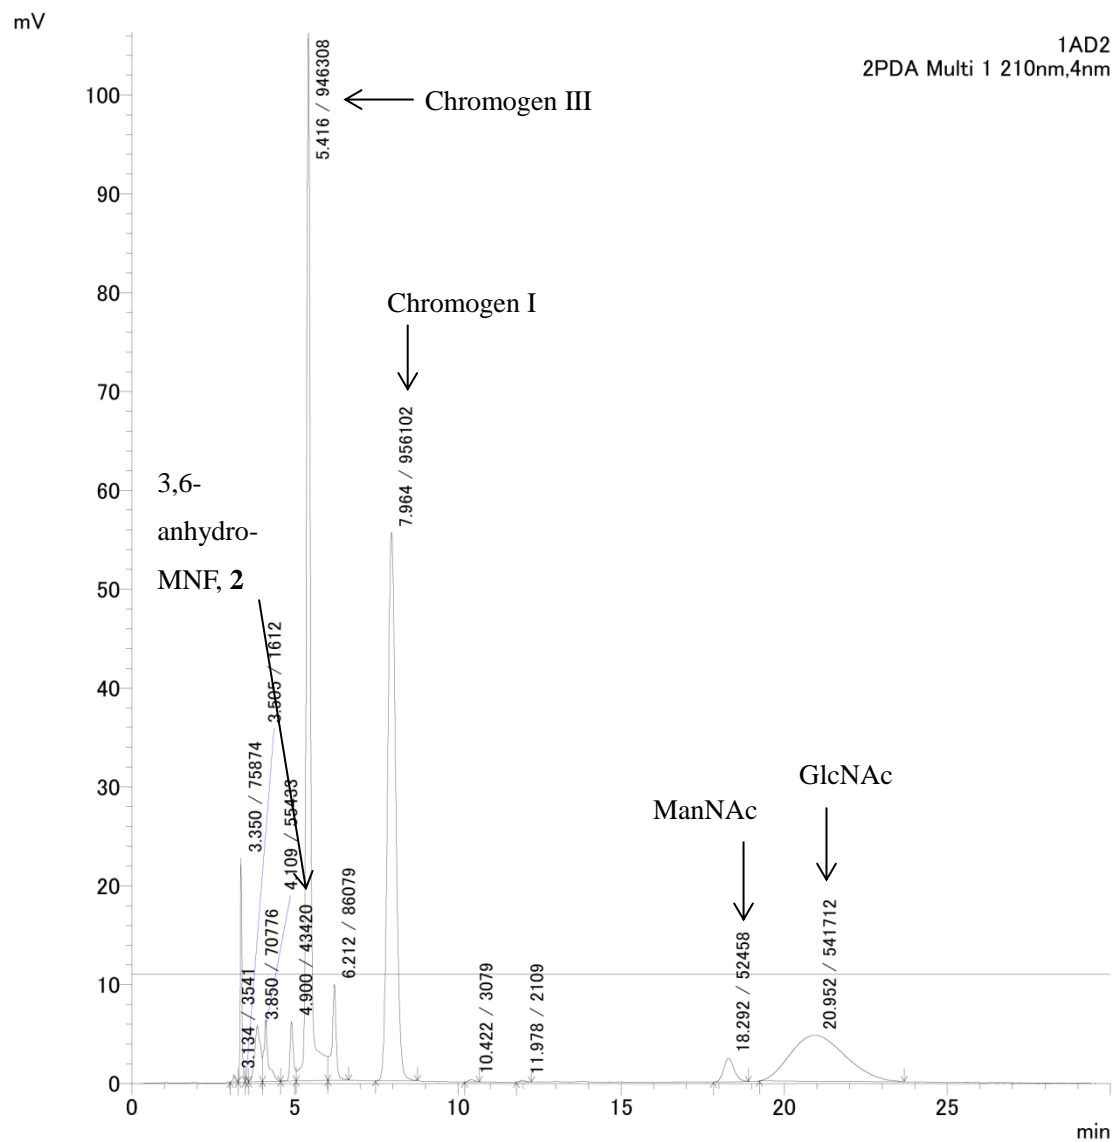

When Chromogen III was high concentration as the product, the peaks of Chromogen III and 3,6-anhydro-GMF, **1** overlapped. To analyze these compounds separately, we conducted the following HPLC method too. However, GlcNAc and ManNAc were not separated and Chromogen I showed two peaks in this method

Column: Unison US-C18 (4.6 × 250mm, Imtakt)

Mobile phase: water

Flow rate: 1.0 mL min<sup>-1</sup>

Column oven temperature: 40°C

(c) 180°C, 25 MPa, reaction time 19 sec

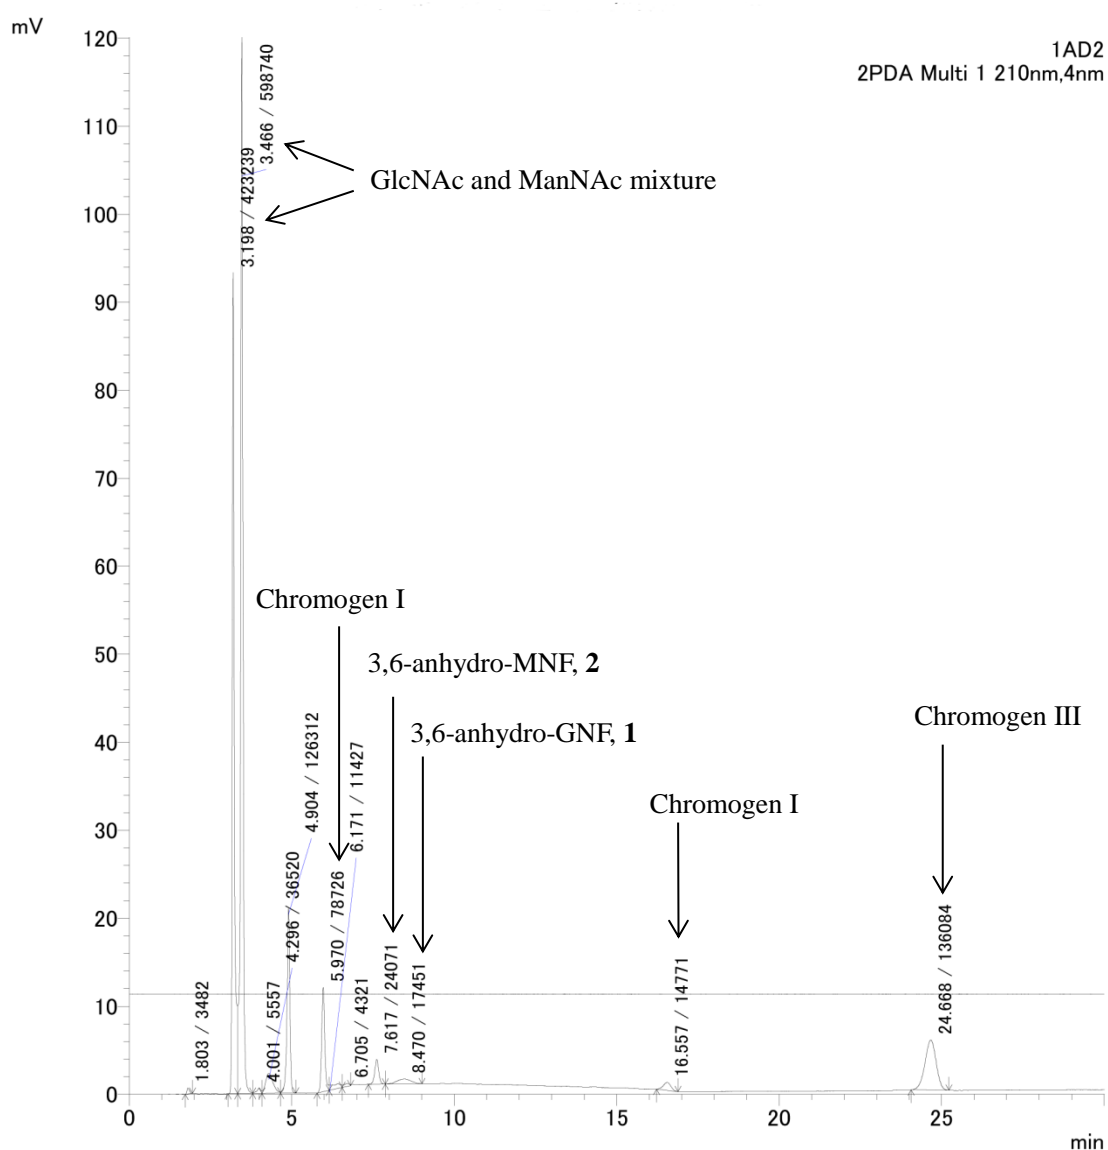

## S2. Characterization of Chromogen I, 3,6-anhydro-GNF, **1**, 3,6-anhydro-MNF, **2**, and Chromogen III

Chromogen I ; HRESIMS:  $m/z$  226.06893  $[M+Na]^+$  (calcd for  $C_8H_{13}N_1Na_1O_5$ , 226.06914).

$^1H$  NMR ( $D_2O$ , 500 MHz)  $\alpha$ -anomer:  $\delta$  6.16 (1H, H-3), 6.04 (1H, H-1), 5.06 (1H, H-4), 3.83–3.57 (3H, H-5, H-6b, H-6a), 2.13 (s, 3H,  $CH_3CONH-$ );  $\beta$ -anomer:  $\delta$  6.21 (1H, H-3),

5.99 (1H, H-1), 4.83 (1H, H-4), 3.83–3.57 (3H, H-5, H-6b, H-6a), 2.13 (s, 3H,  $CH_3CONH-$ );

$^{13}C$  NMR ( $D_2O$ , 125 MHz)  $\alpha$ -anomer:  $\delta$  176.1 ( $CH_3CONH-$ ), 137.0 (C-2), 112.0 (C-3),

102.2 (C-1), 87.5 (C-4), 76.2 (C-5), 65.2 (C-6), 25.4 ( $CH_3CONH-$ );  $\beta$ -anomer:  $\delta$  176.1

( $CH_3CONH-$ ), 136.5 (C-2), 112.7 (C-3), 102.0 (C-1), 87.2 (C-4), 76.5 (C-5), 65.1 (C-6), 25.4

( $CH_3CONH-$ ).

3,6-anhydro-GNF, **1** ; HRESIMS:  $m/z$  226.07013  $[M+Na]^+$  (calcd for  $C_8H_{13}N_1Na_1O_5$ ,

226.06914).  $^1H$  NMR ( $D_2O$ , 500 MHz)  $\alpha$ -anomer:  $\delta$  5.62 (d, 1H,  $J_{1,2} = 5.0$  Hz, H-1), 4.76 (t,

1H,  $J_{3,4} = 5.0$ ,  $J_{4,5} = 5.0$  Hz, H-4), 4.66 (t, 1H,  $J_{2,3} = 5.0$ ,  $J_{3,4} = 5.0$  Hz, H-3), 4.33–4.29 (1H,

H-5), 4.27 (t, 1H,  $J_{1,2} = 5.0$ ,  $J_{2,3} = 5.0$  Hz, H-2), 4.00 (dd, 1H,  $J_{5,6b} = 6.5$ ,  $J_{6a,6b} = 8.5$  Hz,

H-6b), 3.66 (t, 1H,  $J_{5,6a} = 8.5$ ,  $J_{6a,6b} = 8.5$  Hz, H-6a), 2.06 (s, 3H,  $CH_3CONH-$ );  $\beta$ -anomer:  $\delta$

5.44 (1H, H-1), 4.79 (t, 1H,  $J_{3,4} = 5.0$ ,  $J_{4,5} = 5.0$  Hz, H-4), 4.52 (d, 1H,  $J_{3,4} = 5.0$  Hz, H-3),

4.33–4.29 (1H, H-5), 4.18 (1H, H-2), 3.96 (t, 1H,  $J_{5,6b} = 8.0$ ,  $J_{6a,6b} = 8.0$  Hz, H-6b), 3.88 (t,

1H,  $J_{5,6a} = 8.0$ ,  $J_{6a,6b} = 8.0$  Hz, H-6a), 2.02 (s, 3H,  $CH_3CONH-$ );  $^{13}C$  NMR ( $D_2O$ , 125 MHz)

$\alpha$ -anomer:  $\delta$  177.1 ( $CH_3CONH-$ ), 100.4 (C-1), 88.5 (C-3), 81.7 (C-4), 73.0 (C-5, C-6), 61.5

(C-2), 24.56 (CH<sub>3</sub>CONH–); β-anomer: δ 176.8 (CH<sub>3</sub>CONH–), 105.2 (C-1), 88.6 (C-3), 85.6 (C-4), 73.8 (C-6), 73.5 (C-5), 64.7 (C-2), 24.60 (CH<sub>3</sub>CONH–).

3,6-anhydro-MNF, **2** ; HRESIMS:  $m/z$  226.06938 [M+Na]<sup>+</sup> (calcd for C<sub>8</sub>H<sub>13</sub>N<sub>1</sub>Na<sub>1</sub>O<sub>5</sub>, 226.06914). <sup>1</sup>H NMR (D<sub>2</sub>O, 500 MHz) α-anomer: δ 5.53 (d, 1H,  $J_{1,2}$  = 5.5 Hz, H-1), 4.70 (t, 1H,  $J_{3,4}$  = 5.5,  $J_{4,5}$  = 5.5 Hz, H-4), 4.65–4.62 (1H, H-3), 4.42–4.38 (1H, H-5), 4.35 (t, 1H,  $J_{1,2}$  = 5.5,  $J_{2,3}$  = 5.5 Hz, H-2), 3.96–3.89 (2H, H-6b, H-6a), 2.07 (s, 3H, CH<sub>3</sub>CONH–); β-anomer: δ 5.31 (d, 1H,  $J_{1,2}$  = 6.0 Hz, H-1), 4.81 (t, 1H,  $J_{3,4}$  = 4.6,  $J_{4,5}$  = 4.6 Hz, H-4), 4.65–4.62 (1H, H-3), 4.42–4.38 (1H, H-5), 4.25 (t, 1H,  $J_{1,2}$  = 6.0,  $J_{2,3}$  = 6.0 Hz, H-2), 4.02 (dd, 1H,  $J_{5,6b}$  = 6.7,  $J_{6a,6b}$  = 8.4 Hz, H-6b), 3.55 (t, 1H,  $J_{5,6a}$  = 8.4,  $J_{6a,6b}$  = 8.4 Hz, H-6a), 2.05 (s, 3H, CH<sub>3</sub>CONH–); <sup>13</sup>C NMR (D<sub>2</sub>O, 125 MHz) α-anomer: δ 177.0 (CH<sub>3</sub>CONH–), 98.3 (C-1), 84.7 (C-4), 83.0 (C-3), 73.95 (C-5), 73.5 (C-6), 57.5 (C-2), 24.4 (CH<sub>3</sub>CONH–); β-anomer: δ 177.2 (CH<sub>3</sub>CONH–), 103.7 (C-1), 83.5 (C-4), 82.7 (C-3), 74.3 (C-5), 73.90 (C-6), 61.8 (C-2), 24.5 (CH<sub>3</sub>CONH–).

Chromogen III ; HRESIMS:  $m/z$  393.12810 [2M+Na]<sup>+</sup> (calcd for C<sub>16</sub>H<sub>22</sub>N<sub>2</sub>Na<sub>1</sub>O<sub>8</sub>, 393.12739). <sup>1</sup>H NMR (D<sub>2</sub>O, 270 MHz) δ 7.68 (1H, H-1), 6.25 (1H, H-3), 4.59 (1H, H-5), 3.69–3.67 (2H, H-6b, H-6a), 2.00 (s, 3H, CH<sub>3</sub>CONH–).
